# Supplementary material for: Opening Up Intellectual Property Strategy: Implications for Open Source Software Entry by Start-up Firms
Source: Atypon-hosted journal article supplement (doi:10.1287/mnsc.2015.2247), 2015-12-10
Supplement: mnsc.2015.2247-sm-ec.pdf [file mnsc.2015.2247-sm-ec.pdf]

**Electronic Companion—“Opening Up Intellectual Property Strategy: Implications for Open Source Software Entry by Start-up Firms” by Wen Wen, Marco Ceccagnoli, and Chris Forman**

## **APPENDIX A: Additional Details on Data Construction**

### **Identification of Software Markets and the Matching Patent Classes**

#### *Step 1: Identify Software Markets*

To measure entry with new OSS products related to different software markets in each year, a crucial step is to divide the software market into different markets that are reasonably distinct from each other. One main source of software markets is the product code classification system embedded in the PROMT database. For a portion of news articles from PROMT, there are a few product codes assigned to each new article that indicate what product category/categories are associated with that article. All these product categories are organized as a hierarchical structure by PROMT and are defined both in terms of customer markets and technologies. Table A-1 shows some examples of PROMT codes.

However, there are two drawbacks to just relying on PROMT classifications. First, a significant percentage (about 60%) of OSS product introduction news articles from PROMT is missing the product code field. Thus, we must manually assign product codes for this set of articles. Second, the PROMT classes do not include keywords, making it difficult to manually match articles to PROMT classes. Thus, we further match PROMT product code classes with CorpTech product code classes<sup>1</sup> to take advantage of the keywords defined for each CorpTech product code. The resulting concordance table (denoted as the PROMT-CorpTech concordance hereafter) consists of about 80 PROMT codes matched to CorpTech's six-digit or seven-digit product codes. Each product code is associated with a set of technology phrases specific to that product code. This is used as a basis for us to identify (i) the PROMT articles with missing product codes and (ii) the related patents across a variety of software markets. Table A-2 shows some examples of the PROMT-CorpTech concordance.

#### *Step 2: Identify Patent Classes across Software Markets*

Using the NBER patent data project and USPTO database, we constructed our patent dataset, which consists of all patents granted from 1976 to 2009. Our sample period is from 1999 to 2009. To identify the related patents across a range of markets from the PROMT-CorpTech concordance, we first examined specialist firms that produce in only one CorpTech six- or seven-digit code<sup>2</sup>. The sample of single specialists is from the CorpTech directory, over 1992 to 2004 and 2010.<sup>3</sup> We found 3500 patents held by about 700 specialists that have products associated with CorpTech codes from the PROMT-CorpTech concordance. The 3-digit USPTO classes to which the 3500 patents and their forward citations belong served as a starting point for us to map patent classes to each product code: for each product code,

---

<sup>1</sup> There are more than 290 software product codes (denoted as SOF) defined by CorpTech Directory. Each firm in this directory is associated with a set of self-reported product codes selected from these 290 SOF categories.

<sup>2</sup> Examples of CorpTech code are provided in Table A-2.

<sup>3</sup> Unfortunately, data from the CorpTech Directory from 2005 to 2009 was not available.

the top decile of these 3-digit US classes was used as candidates representing the core technologies for that code. While such endeavor to identify patent classes across software markets has been undertaken by prior research, in particular Cockburn and MacGarvie (2006, 2011), we constructed our own classification for several reasons. First, our sample period is more recent than theirs, so the mapping between patent technologies and product markets may have changed over time. Second, Cockburn and MacGarvie (2006, 2011) examined 28 specific CorpTech product codes that have incomplete overlap with the open source product markets that we study. Finally, we took the intersection of the patent classes from the patents in The Commons with the above mapping, which lead to 34 US patent classes and their corresponding product codes.

### *Step 3: Match Software Markets with Patent Class-subclass Combinations*

Because most of the 3-digit US patent classes contain quite heterogeneous technologies, we then further generated a more detailed mapping between software product codes and US patent subclass levels by searching for technology phrases associated with each product code in patent class and subclass description. After identifying possible patent class-subclass, we then decided the concordance between product codes and patent class-subclass manually. This process generated the final mapping between software markets and patent class-subclass combinations. We further consolidated all product codes into 33 software markets based on whether they are supported by the same technologies (similar patent classes), as we are most interested in whether the supply of certain technologies by The Commons helps start-ups move into new technology area. The final concordance that we used in the empirical analysis consists of 33 software markets matched to 422 patent class-subclass combinations. Table A-3 shows some examples of this final concordance between software markets and US patent class-subclass combinations. To boost our confidence, we compared our concordance with the concordance by Cockburn and MacGarvie (2006, 2011). Among the 27 CorpTech codes examined by Cockburn and MacGarvie (2006, 2011), 17 of them closely relates to 12 software markets defined by us, though some of our software markets are broader. We compared the patent class-subclass combinations matched to the 17 product codes by Cockburn and MacGarvie (2006, 2011) with the patent class-subclass combinations matched to the 12 markets by us. As shown in Table A-4, overall, our concordance has good overlap with theirs. Figures A-1 and A-2 present a more concrete view on the above three steps.

### **Keywords used to identify OSS entry**

We used the following set of keywords to search in PROMT news articles for introduction of software products that are licensed as open source. A software product is tagged as open source if it contains any of these keywords. We first implement automatic search and then manually check the results to ensure it is licensed as open source. Our choice of open source license terms is based on the

distribution of open source licenses used by OSS projects at SourceForge.net, which is the largest repository of OSS. Over 230,000 projects and over 3 million users and developers were registered before the end of year 2009 (SourceForge 2009).

|                                           |                                                                                                                                                                                      |
|-------------------------------------------|--------------------------------------------------------------------------------------------------------------------------------------------------------------------------------------|
| Keywords related to generic terms of OSS: | open source , open-sourced, OSS, FLOSS, source code, GPL-compatible, non-copyleft, copyleft, free software license, open source license, open-source license, public domain          |
| Keywords related to open source licenses: | GPL, General Public License , GNU, Lesser General Public License, LGPL, BSD, FreeBSD, Apache License, Apache Software License, Artistic License, MIT License, Mozilla Public License |

### **Data and measure for *IBM matched patents***

As discussed in section 6.4, the variable *IBM matched patents* is used to measure IBM’s IPR holdings that were not contributed to The Commons but yet may proxy for its support to OSS in market  $j$  and year  $t$ . To construct this variable we use the characteristics of IBM’s patents in The Commons, or more specifically, their patent class/subclass and application years. The underlying logic is that if we observe that IBM pledged a patent that belongs to a certain class/subclass of The Commons, other patents in the same class/subclass and that were applied for around the same time would similarly capture IBM’s support for OSS. The variable *IBM matched patents* is constructed in several steps. First, we select IBM patents that were not pledged but (1) belong to the same primary USPTO classification at the subclass level and (2) that were applied for in the same year as patents in The Commons.<sup>4</sup> Second, we match these patents to our 33 software markets according to our concordance between software markets and patent class/subclass. Last, to be consistent with how we measure *The Commons*, we measure *IBM matched patents* using the log of the claims-weighted count of these patents related to market  $j$  in year  $t$  from step 2.

It is worth noting that while *IBM matched patents* is constructed based on the patent class/subclass and application year of IBM’s patents in The Commons, the two variables—*IBM matched patents* and *The Commons*—differ both in their intensity across markets and in their variation over time. For example, the mean and standard deviation of *The Commons* across the 33 markets in year 2005 are 5.293 and 1.917, whereas the mean and standard deviation of *IBM matched patents* in year 2005 are 4.977 and 2.673. We further note that although the patents used to construct *IBM matched patents* were all applied for before December 1999 due to the matching on application year with patents in The Commons (which were all applied for before December 1999), they were granted gradually and so *IBM matched*

<sup>4</sup> This approach is similar to the one used by Thompson and Fox-Kean (2005) and used for Tables 2 and 3 in the paper, with the difference that in Tables 2 (3) we pair each patent in The Commons (each IBM’s patent in The Commons) with only one randomly selected control patent from the market (from IBM’s proprietary patents).

*patents* varies over time during our sample period. On the other hand, the value of *The Commons* is equal to 0 before 2005. The detailed summary statistics for *IBM matched patents* are provided in the below table.

| Variable name       | Obs. | Mean  | Std. Dev. | Min | Max   |
|---------------------|------|-------|-----------|-----|-------|
| IBM matched patents | 363  | 4.779 | 2.634     | 0   | 9.504 |

While *IBM matched patents* could be a useful proxy for IBM’s overall IP support throughout the sample period, as we discuss in details in the paper, we are in particular interested in IBM’s support following the SCO case. Therefore, we interact *IBM matched patents* with a year 2004 dummy (denoted as *IBM matched patents X Year 04*) to capture its support in 2004 and with a year 2003 dummy (denoted as *IBM matched patents X Year 03*) for its support in 2003.

**Table A-1: Examples of PROMT Codes**

---

|         |                                   |
|---------|-----------------------------------|
| 7372502 | Operating systems                 |
| 7372503 | Operating system enhancements     |
| 7372504 | Graphical user interface software |
| 7372505 | Portable document software        |
| 7372510 | Software development tools        |
| 7372511 | CASE software                     |
| 7372512 | Programming utilities             |
| 7372513 | Application development software  |
| 7372514 | Debugging & testing software      |
| 7372520 | Peripheral support software       |
| 7372521 | Device driver software            |
| 7372522 | Data acquisition software         |
| 7372523 | Printer support software          |
| 7372530 | Disk/file management software     |

---

**Table A-2: Examples of the PROMT-CorpTech Concordance**

| CorpTech Code | PROMT Product Code                       |
|---------------|------------------------------------------|
| SOF-CS-F      | 7372650 Fax software                     |
| SOF-DM-M      | 7372421 DBMS                             |
| SOF-HL-M      | 7372466 Medical practice software        |
| SOF-ME-S      | 7372544 Sound/audio software             |
| SOF-OA-MB     | 7372662 BBS software                     |
| SOF-OA-MC     | 7372674 Videoconferencing software       |
| SOF-OA-ME     | 7372605 Electronic mail software         |
| SOF-OA-MG     | 7372630 Workgroup software               |
| SOF-OA-P      | 7372441 DTP software                     |
| SOF-TS-EC     | 7372433 Civil engineering software       |
| SOF-TS-EE     | 7372434 Electrical engineering software  |
| SOF-TS-ER     | 7372423 Geographic information systems   |
| SOF-UT-H      | 7372521 Device driver software           |
| SOF-UT-O      | 7372561 Data center management software  |
| SOF-UT-Q      | 7372513 Application development software |
| SOF-UT-X      | 7372691 Data encryption software         |

**Table A-3: Examples of the Concordance between Software Markets and US Patent Class-subclass Combinations**

| Software Market                  | US class | Subclass Level 0                           | Subclass Level 1                                   |
|----------------------------------|----------|--------------------------------------------|----------------------------------------------------|
| Artificial Intelligence Software | 706      | Fuzzy Logic Hardware                       | Fuzzy Neural Network                               |
| Artificial Intelligence Software | 706      | Knowledge Processing System                | Creation Or Modification                           |
| Artificial Intelligence Software | 706      | Knowledge Processing System                | Knowledge Representation And Reasoning Technique   |
| Artificial Intelligence Software | 706      | Neural Network                             | Learning Method                                    |
| Artificial Intelligence Software | 706      | Neural Network                             | Learning Task                                      |
| Artificial Intelligence Software | 706      | Neural Network                             | Neural Simulation Environment                      |
| Artificial Intelligence Software | 706      | Neural Network                             | Structure                                          |
| Artificial Intelligence Software | 706      | Plural Processing Systems                  |                                                    |
| Data Encryption Software         | 380      | Communication System Using Cryptography    | Having Compression                                 |
| Data Encryption Software         | 380      | Communication System Using Cryptography    | Time Market Interchange                            |
| Data Encryption Software         | 380      | Facsimile Cryptography                     | Including Generation Of An Associated Coded Record |
| Data Encryption Software         | 380      | Key Management                             | Having Particular Key Generator                    |
| Data Encryption Software         | 380      | Key Management                             | Key Distribution                                   |
| Data Encryption Software         | 380      | Particular Algorithmic Function Encoding   | NBS/DES Algorithm                                  |
| Data Encryption Software         | 380      | Particular Algorithmic Function Encoding   | Public Key                                         |
| Data Encryption Software         | 380      | Video Cryptography                         | Copy Protection Or Prevention                      |
| Data Encryption Software         | 726      | Access Control Or Authentication           | Network                                            |
| Data Encryption Software         | 726      | Access Control Or Authentication           | Stand-Alone                                        |
| Data Encryption Software         | 726      | Monitoring Or Scanning Of Software Or Data |                                                    |
| Data Encryption Software         | 726      | Including Attack Prevention                | Intrusion Detection                                |
| Data Encryption Software         | 726      | Protection Of Hardware                     | Theft Prevention                                   |

Note: 1) US patent class 706 is described as “Data processing: artificial intelligence”; US patent class 380 is described as “Cryptography”; US patent class 726 is described as “Information security”. 2) All subclasses within each US patent class are structured hierarchically. “Subclass level 0” means the subclass is on the highest level and “Subclass level 1” means the subclass is on the second highest level. Our mapping is based on subclass level 1.

**Table A-4: Validation of market-patent concordance with Cockburn and MacGarvie (2006, 2011)**

| #  | Concordance by Cockburn and MacGarvie (2006, 2011) |                                           |                                 |                                                                  | Our concordance                                      |              |                                                 |
|----|----------------------------------------------------|-------------------------------------------|---------------------------------|------------------------------------------------------------------|------------------------------------------------------|--------------|-------------------------------------------------|
|    | CorpTech SOF code                                  | CorpTech definition                       | Most commonly cited USPTO class | Subclasses and other class/subclass combinations used in mapping | Software market                                      | Patent class | Patent subclass                                 |
| 1  | DM-MH                                              | Hierarchical DBMS software                | 707                             | 1-10 and 100-104.1                                               | Database software                                    | 707          | 1-10;100-102;104.1;200-206                      |
| 2  | DM-MR                                              | Relational DBMS software                  | 707                             | 1-10 and 100-104.1                                               |                                                      |              |                                                 |
| 3  | DM-Q                                               | Database query language software          | 707                             | 1-10 esp. 002-006 and 100-104.1                                  |                                                      |              |                                                 |
| 4  | OA-ME                                              | Electronic message systems software       | 709                             | 206                                                              | Electronic mail software                             | 709          | 206                                             |
| 5  | TS-ER                                              | Geographic information systems software   | 701                             | 2XXX; 702/005                                                    | Geographic information systems                       | 701          | 117-223;300                                     |
| 6  | UT-H                                               | Peripheral device drivers                 | 710                             | classes 1-74 esp. sub 008-019                                    | Peripheral device drivers                            | 710          | 8-19                                            |
|    |                                                    |                                           |                                 |                                                                  |                                                      | 719          | 321;324;328                                     |
| 7  | AC-B                                               | Invoicing/Billing software                | 705                             | 34, 40, 64-69                                                    | Accounting, financial and business practice software | 705          | 16-45;51-59;64-80                               |
| 8  | AC-T                                               | Tax preparation and reporting software    | 705                             | 019, 031                                                         |                                                      |              |                                                 |
| 9  | AI-A                                               | Voice technology software                 | 704                             | all subclasses up to 278                                         | Voice communications software                        | 704          | 200-256;256.1-256.8;257-278                     |
| 10 | AI-L                                               | Natural language software                 | 704                             | subclasses 8 and 9; class 382                                    | Foreign language translation software                | 704          | 1-10                                            |
| 11 | AI-N                                               | Neural network software                   | 706                             | 15-45                                                            | Artificial intelligence software                     | 706          | 2;10;12;14-62                                   |
| 12 | SV-AR                                              | Artificial intelligence R&D               | 706                             | 15-62                                                            |                                                      |              |                                                 |
| 13 | DM-F                                               | File management software                  | 707                             | sub 1-10 and 200-206                                             | Disk/file management software                        | 711          | 100-173                                         |
|    |                                                    |                                           |                                 |                                                                  |                                                      | 707          | 1-10;200-206                                    |
| 14 | MA-Q                                               | Quality control software                  | 700                             | 108-115                                                          | Manufacturing and business process software          | 700          | 28-55;95-244;266-274                            |
| 15 | WD-I                                               | Inventory management software             | 705                             | esp. 28 and 10                                                   |                                                      | 705          | 7-11;28;29                                      |
| 16 | OA-GD                                              | Three dimensional representation software | 345                             | 418-427 and 700/98; 115-212                                      | Graphics software                                    | 345          | 418-428;440-443;467-475;502-506;519;520;536-689 |
| 17 | OA-P                                               | Desktop publishing software               | 715                             | 500-542                                                          | Personal productivity                                | 715          | 5XX                                             |

**Figure A-1: Identification of Software Markets**

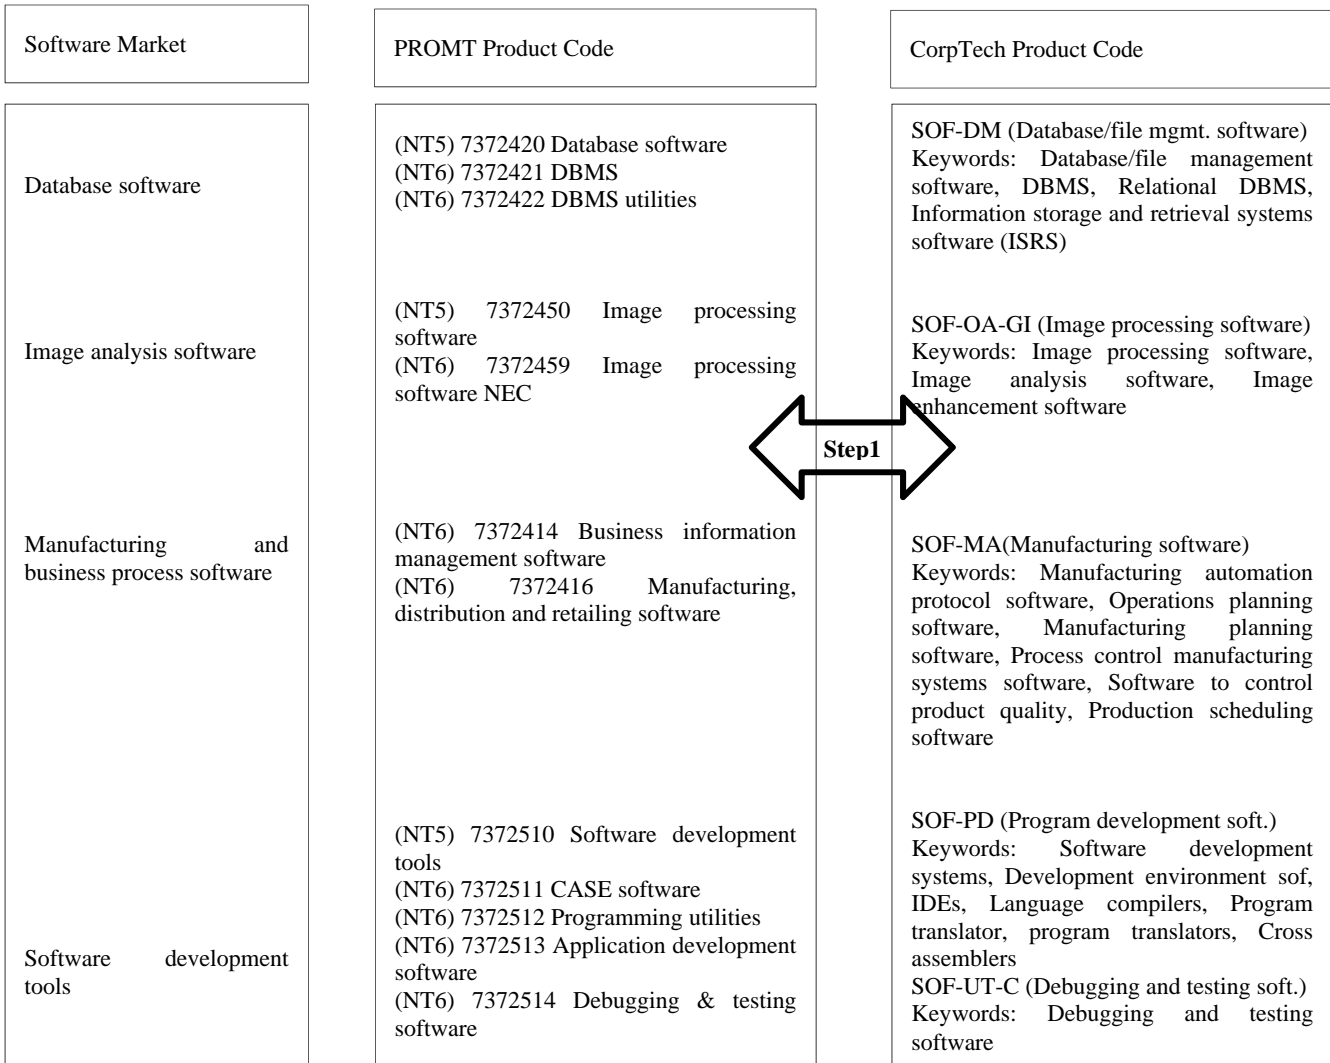

**Figure A-2: Mapping Software Markets to Patent Subclasses**

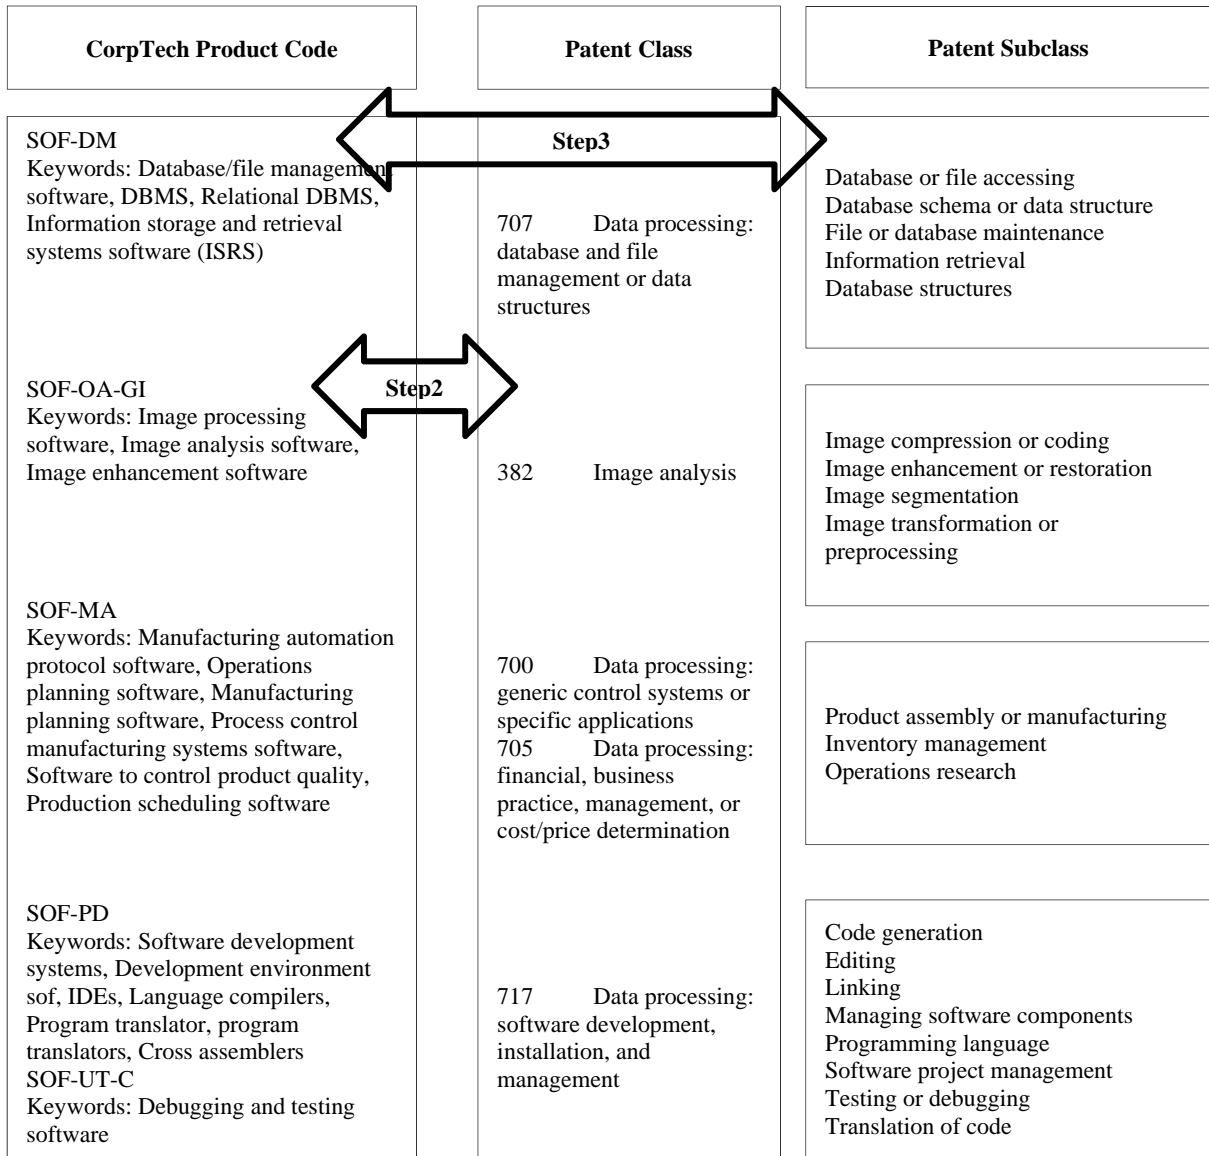

## APPENDIX B: Supporting Empirical Results

**Table B-1: Additional robustness test using market-specific time trends, conditional fixed-effect Poisson regression**

| Dependent variable: OSS entry                                       | (1)               | (2)               | (3)                 | (4)                  | (5)                  | (6)                  | (7)                  | (8)                  |
|---------------------------------------------------------------------|-------------------|-------------------|---------------------|----------------------|----------------------|----------------------|----------------------|----------------------|
| The Commons                                                         | .110***<br>(.039) | -.027<br>(.078)   | -.185*<br>(.097)    | -.060<br>(.165)      | .095***<br>(.033)    | .042<br>(.068)       | .077<br>(.151)       | .032<br>(.167)       |
| The Commons * Cumulativeness                                        |                   | .316***<br>(.112) |                     | .216**<br>(.107)     |                      | .120<br>(.110)       |                      | .120<br>(.110)       |
| The Commons * Concentration                                         |                   |                   | .948***<br>(.359)   | .170<br>(.595)       |                      |                      | .066<br>(.502)       | .035<br>(.545)       |
| Cumulativeness                                                      |                   | -1.047<br>(1.064) |                     | -1.990<br>(1.392)    | 1.408<br>(2.257)     | 1.640<br>(2.254)     | 1.445<br>(2.255)     | 1.659<br>(2.232)     |
| Concentration                                                       |                   |                   | 12.551**<br>(6.026) | 20.338***<br>(7.719) | 21.468***<br>(6.266) | 19.873***<br>(6.327) | 20.946***<br>(6.131) | 19.601***<br>(6.031) |
| Sales growth                                                        |                   |                   |                     |                      | -.862<br>(.777)      | -.869<br>(.783)      | -.862<br>(.779)      | -.869<br>(.785)      |
| Total patents                                                       |                   |                   |                     |                      | 1.664<br>(2.041)     | 1.800<br>(2.029)     | 1.656<br>(2.050)     | 1.795<br>(2.047)     |
| Patent quality                                                      |                   |                   |                     |                      | 2.221<br>(2.916)     | 1.671<br>(3.030)     | 2.169<br>(3.143)     | 1.646<br>(3.255)     |
| Patent age                                                          |                   |                   |                     |                      | -.292<br>(.445)      | -.291<br>(.452)      | -.287<br>(.440)      | -.289<br>(.446)      |
| OIN patents                                                         |                   |                   |                     |                      | -.044<br>(.069)      | -.038<br>(.068)      | -.044<br>(.069)      | -.038<br>(.069)      |
| SSO patents                                                         |                   |                   |                     |                      | .147*<br>(.088)      | .142<br>(.088)       | .147*<br>(.087)      | .142<br>(.088)       |
| OSS demand                                                          |                   |                   |                     |                      | .437**<br>(.175)     | .418**<br>(.179)     | .437**<br>(.175)     | .418**<br>(.181)     |
| Log pseudolikelihood                                                | -223.557          | -220.170          | -219.409            | -216.858             | -210.557             | -210.267             | -210.553             | -210.266             |
| <i>Marginal effects</i>                                             |                   |                   |                     |                      |                      |                      |                      |                      |
| The Commons (average)                                               | .110***<br>(.039) | .207***<br>(.033) | .026<br>(.043)      | .138***<br>(.049)    | .095***<br>(.033)    | .131***<br>(.037)    | .091*<br>(.048)      | .129**<br>(.053)     |
| The Commons (cumulativeness=10%)                                    |                   | .032<br>(.059)    |                     | .018<br>(.060)       |                      | .065<br>(.050)       |                      | .063<br>(.060)       |
| The Commons (cumulativeness=90%)                                    |                   | .439***<br>(.098) |                     | .296***<br>(.108)    |                      | .219**<br>(.106)     |                      | .216*<br>(.115)      |
| Test of the difference between high and low cumulativeness, p-value |                   | .004              |                     | .044                 |                      | .275                 |                      | .279                 |
| The Commons (concentration =10%)                                    |                   |                   | -.059<br>(.058)     | .123<br>(.095)       |                      |                      | .085<br>(.087)       | .126<br>(.095)       |
| The Commons (concentration =90%)                                    |                   |                   | .122**<br>(.052)    | .156***<br>(.041)    |                      |                      | .098***<br>(.036)    | .133***<br>(.040)    |
| Test of the difference between high and low concentration, p-value  |                   |                   | .008                | .776                 |                      |                      | .894                 | .948                 |

Notes: 1) All regressions include market-specific time trends and market fixed effects. Number of observations=286. 2) Robust standard errors, clustered by market, are in parentheses. 3) "Market-specific time trend" is measured by a linear time trend times 33 market dummies. 4) \* significant at 10%, \*\* significant at 5%, \*\*\* significant at 1%.

**Table B-2: Robustness test using linear fixed-effects regression**

| Dependent variable: OSS entry                                             | Specification testing direct impact of The Commons only |                  | Add interaction with cumulativeness of innovation |                  | Add interaction with concentration of patent ownership |                   | Add interaction with cumulativeness of innovation and with concentration of patent ownership |                   |
|---------------------------------------------------------------------------|---------------------------------------------------------|------------------|---------------------------------------------------|------------------|--------------------------------------------------------|-------------------|----------------------------------------------------------------------------------------------|-------------------|
|                                                                           | (1)                                                     | (2)              | (3)                                               | (4)              | (5)                                                    | (6)               | (7)                                                                                          | (8)               |
| The Commons                                                               | .116<br>(.072)                                          | .139<br>(.086)   | .082<br>(.080)                                    | .105<br>(.092)   | -.141<br>(.087)                                        | -.122*<br>(.069)  | -.158<br>(.097)                                                                              | -.139*<br>(.081)  |
| The Commons *<br>Cumulativeness                                           |                                                         |                  | .101<br>(.061)                                    | .097<br>(.061)   |                                                        |                   | .080<br>(.061)                                                                               | .077<br>(.060)    |
| The Commons *<br>Concentration                                            |                                                         |                  |                                                   |                  | .930**<br>(.422)                                       | .934**<br>(.390)  | .894**<br>(.421)                                                                             | .900*<br>(.392)   |
| Cumulativeness                                                            | .085<br>(.658)                                          | .296<br>(.727)   | .928<br>(.740)                                    | 1.091<br>(.757)  | .182<br>(.593)                                         | .353<br>(.612)    | .848<br>(.684)                                                                               | .978<br>(.683)    |
| Concentration                                                             | -.019<br>(3.861)                                        | -.309<br>(3.722) | .545<br>(3.792)                                   | .246<br>(3.712)  | 1.373<br>(3.705)                                       | 1.077<br>(3.744)  | 1.767<br>(3.604)                                                                             | 1.465<br>(3.669)  |
| Sales growth                                                              | -.469<br>(.313)                                         | -.450<br>(.335)  | -.504<br>(.316)                                   | -.482<br>(.334)  | -.553<br>(.350)                                        | -.518<br>(.364)   | -.577<br>(.347)                                                                              | -.542<br>(.359)   |
| Total patents                                                             | -.515<br>(.796)                                         | -.458<br>(.880)  | .025<br>(.870)                                    | .052<br>(.911)   | -.471<br>(.742)                                        | -.470<br>(.769)   | -.043<br>(.726)                                                                              | -.067<br>(.739)   |
| Patent quality                                                            | -.337<br>(1.139)                                        | -.563<br>(1.255) | -.415<br>(1.162)                                  | -.629<br>(1.272) | -.102<br>(1.179)                                       | -.385<br>(1.260)  | -.173<br>(1.208)                                                                             | -.443<br>(1.286)  |
| Patent age                                                                | -.152<br>(.106)                                         | -.134<br>(.109)  | -.116<br>(.103)                                   | -.101<br>(.105)  | -.295***<br>(.097)                                     | -.268**<br>(.113) | -.261***<br>(.093)                                                                           | -.236**<br>(.111) |
| OIN patents                                                               |                                                         | -.014<br>(.036)  |                                                   | -.012<br>(.036)  |                                                        | -.011<br>(.032)   |                                                                                              | -.009<br>(.032)   |
| SSO patents                                                               |                                                         | -.043<br>(.077)  |                                                   | -.040<br>(.074)  |                                                        | -.032<br>(.062)   |                                                                                              | -.030<br>(.060)   |
| OSS demand                                                                |                                                         | .061<br>(.046)   |                                                   | .059<br>(.045)   |                                                        | .078*<br>(.046)   |                                                                                              | .076<br>(.046)    |
| Year dummies                                                              | Yes                                                     | Yes              | Yes                                               | Yes              | Yes                                                    | Yes               | Yes                                                                                          | Yes               |
| Market fixed effects                                                      | Yes                                                     | Yes              | Yes                                               | Yes              | Yes                                                    | Yes               | Yes                                                                                          | Yes               |
| Observations                                                              | 363                                                     | 363              | 363                                               | 363              | 363                                                    | 363               | 363                                                                                          | 363               |
| R-squared                                                                 | .589                                                    | .590             | .591                                              | .593             | .600                                                   | .602              | .602                                                                                         | .604              |
| <i>Marginal effects</i>                                                   |                                                         |                  |                                                   |                  |                                                        |                   |                                                                                              |                   |
| The Commons (average)                                                     | .115<br>(.072)                                          | .139*<br>(.086)  | .164**<br>(.081)                                  | .184**<br>(.093) | .070<br>(.049)                                         | .090*<br>(.054)   | .110**<br>(.045)                                                                             | .127**<br>(.052)  |
| The Commons<br>(cumulativeness=10%)                                       |                                                         |                  | .104<br>(.077)                                    | .126<br>(.090)   |                                                        |                   | .062<br>(.054)                                                                               | .081<br>(.060)    |
| The Commons<br>(cumulativeness=90%)                                       |                                                         |                  | .243**<br>(.107)                                  | .260**<br>(.117) |                                                        |                   | .172**<br>(.068)                                                                             | .187**<br>(.074)  |
| Test of the difference<br>between high and low<br>cumulativeness, p-value |                                                         |                  | .098                                              | .111             |                                                        |                   | .184                                                                                         | .201              |
| The Commons<br>(concentration =10%)                                       |                                                         |                  |                                                   |                  | -.020<br>(.048)                                        | -.001<br>(.042)   | .023<br>(.048)                                                                               | .040<br>(.047)    |
| The Commons<br>(concentration =90%)                                       |                                                         |                  |                                                   |                  | .170**<br>(.080)                                       | .190**<br>(.087)  | .206***<br>(.074)                                                                            | .223***<br>(.082) |
| Test of the difference<br>between high and low<br>concentration, p-value  |                                                         |                  |                                                   |                  | .028                                                   | .017              | .033                                                                                         | .022              |

Notes: 1) Robust standard errors, clustered by market, are in parentheses. 2) \* significant at 10%, \*\* significant at 5%, \*\*\* significant at 1%. 3) R-squared includes fixed effects in R-squared computation.

**Table B-3: Robustness test using raw number of patents, conditional fixed-effect Poisson regression**

| Dependent variable: OSS entry                                            | Specification testing direct impact of The Commons only |                   | Add interaction with cumulateness of innovation |                    | Add interaction with concentration of patent ownership |                    | Add interaction with cumulateness of innovation and with concentration of patent ownership |                     |
|--------------------------------------------------------------------------|---------------------------------------------------------|-------------------|-------------------------------------------------|--------------------|--------------------------------------------------------|--------------------|--------------------------------------------------------------------------------------------|---------------------|
|                                                                          | (1)                                                     | (2)               | (3)                                             | (4)                | (5)                                                    | (6)                | (7)                                                                                        | (8)                 |
| The Commons                                                              | .134<br>(.150)                                          | .169<br>(.154)    | -.025<br>(.171)                                 | .022<br>(.172)     | -.373<br>(.260)                                        | -.380<br>(.293)    | -.199<br>(.249)                                                                            | -.161<br>(.341)     |
| The Commons *<br>Cumulateness                                            |                                                         |                   | .692***<br>(.157)                               | .646***<br>(.164)  |                                                        |                    | .624***<br>(.183)                                                                          | .572**<br>(.223)    |
| The Commons *<br>Concentration                                           |                                                         |                   |                                                 |                    | 1.524**<br>(.624)                                      | 1.613**<br>(.717)  | .556<br>(.669)                                                                             | .577<br>(.972)      |
| Cumulateness                                                             | .616<br>(1.162)                                         | .581<br>(1.172)   | 2.657**<br>(1.103)                              | 2.565**<br>(1.164) | .754<br>(1.035)                                        | .667<br>(.995)     | 2.524**<br>(1.133)                                                                         | 2.369*<br>(1.238)   |
| Concentration                                                            | -5.494<br>(6.101)                                       | -6.758<br>(7.630) | -10.908*<br>(5.726)                             | -12.078<br>(7.775) | -12.264<br>(7.993)                                     | -11.481<br>(8.191) | -12.802*<br>(6.621)                                                                        | -13.148*<br>(7.511) |
| Sales growth                                                             | -.398<br>(.324)                                         | -.305<br>(.343)   | -.598<br>(.380)                                 | -.508<br>(.395)    | -.450<br>(.341)                                        | -.388<br>(.356)    | -.598<br>(.377)                                                                            | -.511<br>(.392)     |
| Total patents                                                            | -.431<br>(1.324)                                        | -.802<br>(1.432)  | .646<br>(1.341)                                 | .424<br>(1.435)    | -.777<br>(1.292)                                       | -1.122<br>(1.404)  | .434<br>(1.414)                                                                            | .178<br>(1.613)     |
| Patent quality                                                           | -.358<br>(2.409)                                        | -1.122<br>(2.371) | -.424<br>(2.287)                                | -.894<br>(2.236)   | -.074<br>(2.404)                                       | -.793<br>(2.262)   | -.316<br>(2.256)                                                                           | -.796<br>(2.163)    |
| Patent age                                                               | -.274<br>(.177)                                         | -.189<br>(.178)   | -.320*<br>(.173)                                | -.252<br>(.171)    | -.385**<br>(.183)                                      | -.267*<br>(.161)   | -.353*<br>(.189)                                                                           | -.271<br>(.173)     |
| OIN patents                                                              |                                                         | -.062<br>(.074)   |                                                 | -.068<br>(.067)    |                                                        | -.062<br>(.074)    |                                                                                            | -.067<br>(.068)     |
| SSO patents                                                              |                                                         | -.004<br>(.083)   |                                                 | -.012<br>(.067)    |                                                        | .045<br>(.090)     |                                                                                            | .007<br>(.089)      |
| OSS demand                                                               |                                                         | .311**<br>(.156)  |                                                 | .229<br>(.147)     |                                                        | .305**<br>(.152)   |                                                                                            | .237<br>(.151)      |
| Year dummies                                                             | Yes                                                     | Yes               | Yes                                             | Yes                | Yes                                                    | Yes                | Yes                                                                                        | Yes                 |
| Market fixed effects                                                     | Yes                                                     | Yes               | Yes                                             | Yes                | Yes                                                    | Yes                | Yes                                                                                        | Yes                 |
| Observations                                                             | 286                                                     | 286               | 286                                             | 286                | 286                                                    | 286                | 286                                                                                        | 286                 |
| Log pseudolikelihood                                                     | -227.874                                                | -225.796          | -222.780                                        | -221.522           | -225.977                                               | -223.968           | -222.580                                                                                   | -221.348            |
| <i>Marginal effects</i>                                                  |                                                         |                   |                                                 |                    |                                                        |                    |                                                                                            |                     |
| The Commons (average)                                                    | .134<br>(.150)                                          | .169<br>(.154)    | .489***<br>(.166)                               | .501***<br>(.172)  | -.035<br>(.163)                                        | -.023<br>(.174)    | .387**<br>(.186)                                                                           | .392<br>(.253)      |
| The Commons<br>(cumulateness=10%)                                        |                                                         |                   | .106<br>(.162)                                  | .144<br>(.164)     |                                                        |                    | .042<br>(.163)                                                                             | .075<br>(.192)      |
| The Commons<br>(cumulateness=90%)                                        |                                                         |                   | .995***<br>(.229)                               | .974***<br>(.243)  |                                                        |                    | .844***<br>(.277)                                                                          | .810**<br>(.383)    |
| Test of the difference<br>between high and low<br>cumulateness, p-value  |                                                         |                   | .001                                            | .001               |                                                        |                    | .001                                                                                       | .010                |
| The Commons<br>(concentration =10%)                                      |                                                         |                   |                                                 |                    | -.171<br>(.196)                                        | -.167<br>(.216)    | .338<br>(.225)                                                                             | .340<br>(.324)      |
| The Commons<br>(concentration =90%)                                      |                                                         |                   |                                                 |                    | .120<br>(.143)                                         | .141<br>(.147)     | .444***<br>(.157)                                                                          | .450**<br>(.188)    |
| Test of the difference<br>between high and low<br>concentration, p-value |                                                         |                   |                                                 |                    | .015                                                   | .025               | .406                                                                                       | .553                |

Notes: 1) Robust standard errors, clustered by market, are in parentheses. 2) \* significant at 10%, \*\* significant at 5%, \*\*\* significant at 1%. 3) The number of observations is lower than 363 because of the use of conditional fixed effects Poisson models, which drops markets without OSS entry over the entire sample period.

**Table B-4: Robustness test using raw number of patents, linear fixed-effects regression**

| Dependent variable: OSS entry                                             | Specification testing direct impact of The Commons only |                  | Add interaction with cumulativeness of innovation |                  | Add interaction with concentration of patent ownership |                   | Add interaction with cumulativeness of innovation and with concentration of patent ownership |                   |
|---------------------------------------------------------------------------|---------------------------------------------------------|------------------|---------------------------------------------------|------------------|--------------------------------------------------------|-------------------|----------------------------------------------------------------------------------------------|-------------------|
|                                                                           | (1)                                                     | (2)              | (3)                                               | (4)              | (5)                                                    | (6)               | (7)                                                                                          | (8)               |
| The Commons                                                               | .168<br>(.124)                                          | .206<br>(.148)   | .061<br>(.129)                                    | .100<br>(.143)   | -.362**<br>(.167)                                      | -.331**<br>(.134) | -.379**<br>(.177)                                                                            | -.343**<br>(.146) |
| The Commons *<br>Cumulativeness                                           |                                                         |                  | .328*<br>(.174)                                   | .334*<br>(.180)  |                                                        |                   | .222<br>(.172)                                                                               | .227<br>(.177)    |
| The Commons *<br>Concentration                                            |                                                         |                  |                                                   |                  | 1.952**<br>(.820)                                      | 1.939**<br>(.743) | 1.749**<br>(.829)                                                                            | 1.722**<br>(.760) |
| Cumulativeness                                                            | -.100<br>(.679)                                         | .064<br>(.695)   | 1.146<br>(.810)                                   | 1.346<br>(.835)  | .197<br>(.578)                                         | .288<br>(.568)    | 1.010<br>(.782)                                                                              | 1.133<br>(.776)   |
| Concentration                                                             | .094<br>(3.999)                                         | -.170<br>(3.878) | 1.349<br>(3.962)                                  | 1.100<br>(3.924) | .908<br>(3.534)                                        | .649<br>(3.641)   | 1.672<br>(3.377)                                                                             | 1.419<br>(3.539)  |
| Sales growth                                                              | -.478<br>(.321)                                         | -.459<br>(.346)  | -.539<br>(.333)                                   | -.525<br>(.355)  | -.558<br>(.354)                                        | -.521<br>(.368)   | -.591*<br>(.353)                                                                             | -.558<br>(.365)   |
| Total patents                                                             | -.640<br>(.691)                                         | -.620<br>(.757)  | .147<br>(.877)                                    | .194<br>(.904)   | -.448<br>(.659)                                        | -.506<br>(.682)   | .065<br>(.737)                                                                               | .034<br>(.747)    |
| Patent quality                                                            | -.240<br>(1.134)                                        | -.462<br>(1.243) | -.416<br>(1.148)                                  | -.631<br>(1.248) | .110<br>(1.199)                                        | -.160<br>(1.266)  | -.046<br>(1.213)                                                                             | -.309<br>(1.277)  |
| Patent age                                                                | -.185*<br>(.093)                                        | -.174<br>(.107)  | -.138<br>(.099)                                   | -.130<br>(.107)  | -.311***<br>(.088)                                     | -.287**<br>(.109) | -.266***<br>(.095)                                                                           | -.245**<br>(.113) |
| OIN patents                                                               |                                                         | -.015<br>(.038)  |                                                   | -.016<br>(.036)  |                                                        | -.006<br>(.034)   |                                                                                              | -.008<br>(.033)   |
| SSO patents                                                               |                                                         | -.044<br>(.079)  |                                                   | -.049<br>(.075)  |                                                        | -.025<br>(.061)   |                                                                                              | -.031<br>(.060)   |
| OSS demand                                                                |                                                         | .063<br>(.045)   |                                                   | .061<br>(.043)   |                                                        | .077*<br>(.045)   |                                                                                              | .074<br>(.045)    |
| Year dummies                                                              | Yes                                                     | Yes              | Yes                                               | Yes              | Yes                                                    | Yes               | Yes                                                                                          | Yes               |
| Market fixed effects                                                      | Yes                                                     | Yes              | Yes                                               | Yes              | Yes                                                    | Yes               | Yes                                                                                          | Yes               |
| Observations                                                              | 363                                                     | 363              | 363                                               | 363              | 363                                                    | 363               | 363                                                                                          | 363               |
| R-squared                                                                 | .588                                                    | .590             | .594                                              | .597             | .602                                                   | .604              | .605                                                                                         | .607              |
| <i>Marginal effects</i>                                                   |                                                         |                  |                                                   |                  |                                                        |                   |                                                                                              |                   |
| The Commons (average)                                                     | .168<br>(.124)                                          | .206<br>(.148)   | .326**<br>(.149)                                  | .370**<br>(.175) | .081<br>(.093)                                         | .108<br>(.106)    | .197**<br>(.083)                                                                             | .231**<br>(.103)  |
| The Commons<br>(cumulativeness=10%)                                       |                                                         |                  | .132<br>(.119)                                    | .173<br>(.138)   |                                                        |                   | .066<br>(.097)                                                                               | .097<br>(.105)    |
| The Commons<br>(cumulativeness=90%)                                       |                                                         |                  | .582**<br>(.255)                                  | .631**<br>(.284) |                                                        |                   | .371**<br>(.188)                                                                             | .408**<br>(.208)  |
| Test of the difference<br>between high and low<br>cumulativeness, p-value |                                                         |                  | .059                                              | .064             |                                                        |                   | .195                                                                                         | .199              |
| The Commons<br>(concentration =10%)                                       |                                                         |                  |                                                   |                  | -.107<br>(.091)                                        | -.078<br>(.085)   | .029<br>(.096)                                                                               | .065<br>(.102)    |
| The Commons<br>(concentration =90%)                                       |                                                         |                  |                                                   |                  | .291<br>(.155)                                         | .317*<br>(.167)   | .386***<br>(.139)                                                                            | .416***<br>(.154) |
| Test of the difference<br>between high and low<br>concentration, p-value  |                                                         |                  |                                                   |                  | .017                                                   | .009              | .035                                                                                         | .023              |

Notes: 1) Robust standard errors, clustered by market, are in parentheses. 2) \* significant at 10%, \*\* significant at 5%, \*\*\* significant at 1%. 3) R-squared includes fixed effects in R-squared computation.

**Table B-5: Robustness using citation-weighted count of patents, conditional fixed-effect Poisson regression**

| Dependent variable: OSS entry                                       | Use the citations without adjustment for truncation |                     |                    |                     | Use the citations with adjustment for truncation |                    |                    |                     | Use the citations received in three-year post grant window |                     |                    |                     |
|---------------------------------------------------------------------|-----------------------------------------------------|---------------------|--------------------|---------------------|--------------------------------------------------|--------------------|--------------------|---------------------|------------------------------------------------------------|---------------------|--------------------|---------------------|
|                                                                     | (1)                                                 | (2)                 | (3)                | (4)                 | (5)                                              | (6)                | (7)                | (8)                 | (9)                                                        | (10)                | (11)               | (12)                |
| The Commons                                                         | .079<br>(.079)                                      | -.029<br>(.105)     | -.255*<br>(.144)   | -.265*<br>(.142)    | .090<br>(.072)                                   | -.001<br>(.101)    | -.221<br>(.135)    | -.226*<br>(.127)    | .089<br>(.089)                                             | -.032<br>(.117)     | -.310*<br>(.178)   | -.293*<br>(.164)    |
| The Commons * Cumulativeness                                        |                                                     | .312***<br>(.111)   |                    | .252**<br>(.124)    |                                                  | .288***<br>(.103)  |                    | .235**<br>(.113)    |                                                            | .402***<br>(.125)   |                    | .328**<br>(.144)    |
| The Commons * Concentration                                         |                                                     |                     | 1.062**<br>(.414)  | .811*<br>(.451)     |                                                  |                    | .961**<br>(.383)   | .734*<br>(.407)     |                                                            |                     | 1.232**<br>(.490)  | .860<br>(.532)      |
| Cumulativeness                                                      | .820<br>(1.085)                                     | 2.838***<br>(1.069) | .587<br>(.989)     | 2.267*<br>(1.215)   | .745<br>(1.080)                                  | 2.764**<br>(1.092) | .504<br>(.977)     | 2.214*<br>(1.219)   | .762<br>(1.060)                                            | 2.784***<br>(1.062) | .704<br>(.958)     | 2.385**<br>(1.174)  |
| Concentration                                                       | -4.899<br>(5.801)                                   | -8.597*<br>(4.986)  | -12.712<br>(8.288) | -13.793*<br>(7.323) | -4.990<br>(5.807)                                | -8.805*<br>(5.022) | -12.477<br>(8.262) | -13.749*<br>(7.258) | -4.875<br>(5.801)                                          | -8.859*<br>(5.062)  | -12.928<br>(8.447) | -13.692*<br>(7.349) |
| Sales growth                                                        | -.403<br>(.328)                                     | -.556<br>(.360)     | -.460<br>(.350)    | -.570<br>(.361)     | -.402<br>(.327)                                  | -.545<br>(.356)    | -.462<br>(.350)    | -.565<br>(.360)     | -.402<br>(.327)                                            | -.561<br>(.363)     | -.461<br>(.348)    | -.573<br>(.363)     |
| Total patents                                                       | -.181<br>(1.445)                                    | 1.224<br>(1.431)    | -1.033<br>(1.354)  | .296<br>(1.449)     | -.266<br>(1.450)                                 | 1.125<br>(1.453)   | -1.096<br>(1.354)  | .237<br>(1.449)     | -.237<br>(1.419)                                           | 1.113<br>(1.429)    | -.910<br>(1.313)   | .404<br>(1.427)     |
| Patent quality                                                      | -.272<br>(2.496)                                    | -.007<br>(2.410)    | -.192<br>(2.461)   | .001<br>(2.401)     | -.356<br>(2.503)                                 | -.136<br>(2.418)   | -.235<br>(2.471)   | -.090<br>(2.411)    | -.259<br>(2.499)                                           | -.034<br>(2.411)    | -.105<br>(2.446)   | .023<br>(2.386)     |
| Patent age                                                          | -.243<br>(.173)                                     | -.222<br>(.165)     | -.439**<br>(.191)  | -.375*<br>(.199)    | -.248<br>(.173)                                  | -.221<br>(.167)    | -.446**<br>(.195)  | -.375*<br>(.201)    | -.256<br>(.174)                                            | -.266<br>(.164)     | -.422**<br>(.188)  | -.377**<br>(.191)   |
| Log pseudolikelihood                                                | -227.965                                            | -224.842            | -225.263           | -223.398            | -227.874                                         | -224.770           | -225.315           | -223.4012           | -227.966                                                   | -224.3612           | -225.410           | -223.249            |
| <i>Marginal effects</i>                                             |                                                     |                     |                    |                     |                                                  |                    |                    |                     |                                                            |                     |                    |                     |
| The Commons (average)                                               | .079<br>(.079)                                      | .203**<br>(.085)    | -.020<br>(.079)    | .101<br>(.082)      | .090<br>(.072)                                   | .213***<br>(.081)  | -.008<br>(.075)    | .111<br>(.073)      | .089<br>(.089)                                             | .267***<br>(.093)   | -.037<br>(.096)    | .141<br>(.095)      |
| The Commons (cumulativeness=10%)                                    |                                                     | .030<br>(.094)      |                    | -.038<br>(.083)     |                                                  | .053<br>(.090)     |                    | -.019<br>(.075)     |                                                            | .044<br>(.104)      |                    | -.040<br>(.091)     |
| The Commons (cumulativeness=90%)                                    |                                                     | .431***<br>(.129)   |                    | .285<br>(.145)      |                                                  | .423***<br>(.120)  |                    | .283**<br>(.130)    |                                                            | .560***<br>(.143)   |                    | .381**<br>(.172)    |
| Test of the difference between high and low cumulativeness, p-value |                                                     | .005                |                    | .043                |                                                  | .005               |                    | .038                |                                                            | .001                |                    | .023                |
| The Commons (concentration =10%)                                    |                                                     |                     | -.114<br>(.100)    | .029<br>(.110)      |                                                  |                    | -.094<br>(.095)    | .046<br>(.097)      |                                                            |                     | -.147<br>(.124)    | .065<br>(.129)      |
| The Commons (concentration =90%)                                    |                                                     |                     | .088<br>(.072)     | .184<br>(.068)      |                                                  |                    | .090<br>(.068)     | .186***<br>(.063)   |                                                            |                     | .088<br>(.083)     | .229***<br>(.075)   |
| Test of the difference between high and low concentration, p-value  |                                                     |                     | .010               | .072                |                                                  |                    | .012               | .071                |                                                            |                     | .012               | .106                |

Notes: 1) In columns 1 to 8 we use the total citations received by December 2004 to eliminate the possibility that contributing to The Commons might result in an increase in forward citations (e.g., Rysman and Simcoe 2008). This is similar to our calculations used in Table 2/3 in the paper. 2) All regressions include year dummies and market fixed effects. Number of observations=286. This number of observations is lower than 363 because of the use of conditional fixed effects Poisson models, which drops markets without OSS entry over the entire sample period. 3) Robust standard errors, clustered by market, are in parentheses. 4) \* significant at 10%, \*\* significant at 5%, \*\*\* significant at 1%.

**Table B-6: Robustness test using sample from year 1999 to 2008, conditional fixed-effect Poisson regression**

| Dependent variable: OSS entry                                             | (1)               | (2)                | (3)                  | (4)                 | (5)                 | (6)                 | (7)                  | (8)                  |
|---------------------------------------------------------------------------|-------------------|--------------------|----------------------|---------------------|---------------------|---------------------|----------------------|----------------------|
| The Commons                                                               | .140<br>(.101)    | .155<br>(.109)     | .042<br>(.160)       | .066<br>(.162)      | -.172<br>(.124)     | -.182<br>(.142)     | -.152<br>(.141)      | -.144<br>(.185)      |
| The Commons *<br>Cumulativeness                                           |                   |                    | .346***<br>(.096)    | .320***<br>(.096)   |                     |                     | .300***<br>(.099)    | .268**<br>(.108)     |
| The Commons *<br>Concentration                                            |                   |                    |                      |                     | .903**<br>(.378)    | .948**<br>(.407)    | .568<br>(.355)       | .606<br>(.469)       |
| Cumulativeness                                                            | .572<br>(1.323)   | .568<br>(1.418)    | 3.054**<br>(1.288)   | 2.928**<br>(1.404)  | .346<br>(1.232)     | .268<br>(1.262)     | 2.618*<br>(1.339)    | 2.362<br>(1.489)     |
| Concentration                                                             | -8.884<br>(6.716) | -10.751<br>(8.553) | -14.011**<br>(6.209) | -15.658*<br>(8.586) | -15.699*<br>(8.935) | -15.518*<br>(9.503) | -17.458**<br>(7.560) | -17.782**<br>(8.739) |
| Sales growth                                                              | -.443<br>(.365)   | -.328<br>(.392)    | -.605<br>(.419)      | -.497<br>(.434)     | -.506<br>(.390)     | -.424<br>(.413)     | -.626<br>(.422)      | -.528<br>(.439)      |
| Total patents                                                             | -.513<br>(1.472)  | -.866<br>(1.621)   | 1.058<br>(1.470)     | .776<br>(1.594)     | -1.195<br>(1.478)   | -1.531<br>(1.602)   | .460<br>(1.479)      | .107<br>(1.691)      |
| Patent quality                                                            | -.174<br>(2.545)  | -.885<br>(2.527)   | -.105<br>(2.431)     | -.564<br>(2.413)    | .094<br>(2.536)     | -.553<br>(2.404)    | .055<br>(2.428)      | -.392<br>(2.341)     |
| Patent age                                                                | -.227<br>(.212)   | -.160<br>(.220)    | -.180<br>(.209)      | -.135<br>(.213)     | -.402*<br>(.232)    | -.303<br>(.215)     | -.290<br>(.226)      | -.226<br>(.218)      |
| OIN patents                                                               |                   | -.037<br>(.072)    |                      | -.039<br>(.066)     |                     | -.042<br>(.070)     |                      | -.040<br>(.067)      |
| SSO patents                                                               |                   | -.018<br>(.083)    |                      | -.025<br>(.070)     |                     | .029<br>(.089)      |                      | .007<br>(.086)       |
| OSS demand                                                                |                   | .297*<br>(.156)    |                      | .221<br>(.147)      |                     | .303*<br>(.155)     |                      | .237<br>(.151)       |
| Year dummies                                                              | Yes               | Yes                | Yes                  | Yes                 | Yes                 | Yes                 | Yes                  | Yes                  |
| Market fixed effects                                                      | Yes               | Yes                | Yes                  | Yes                 | Yes                 | Yes                 | Yes                  | Yes                  |
| Observations                                                              | 260               | 260                | 260                  | 260                 | 260                 | 260                 | 260                  | 260                  |
| Log pseudolikelihood                                                      | -212.602          | -210.717           | -208.344             | -207.227            | -210.583            | -208.753            | -207.641             | -206.547             |
| <i>Marginal effects</i>                                                   |                   |                    |                      |                     |                     |                     |                      |                      |
| The Commons (average)                                                     | .140<br>(.101)    | .155<br>(.109)     | .307*<br>(.160)      | .312*<br>(.164)     | .033<br>(.077)      | .033<br>(.085)      | .207**<br>(.105)     | .198<br>(.138)       |
| The Commons<br>(cumulativeness=10%)                                       |                   |                    | .111<br>(.157)       | .130<br>(.159)      |                     |                     | .037<br>(.112)       | .047<br>(.128)       |
| The Commons<br>(cumulativeness=90%)                                       |                   |                    | .566***<br>(.190)    | .551***<br>(.195)   |                     |                     | .431***<br>(.135)    | .398**<br>(.185)     |
| Test of the difference<br>between high and low<br>cumulativeness, p-value |                   |                    | .001                 | .001                |                     |                     | .002                 | .013                 |
| The Commons<br>(concentration =10%)                                       |                   |                    |                      |                     | -.046<br>(.088)     | -.050<br>(.101)     | .157<br>(.113)       | .145<br>(.163)       |
| The Commons<br>(concentration =90%)                                       |                   |                    |                      |                     | .124<br>(.080)      | .129<br>(.084)      | .264**<br>(.106)     | .260**<br>(.122)     |
| Test of the difference<br>between high and low<br>concentration, p-value  |                   |                    |                      |                     | .017                | .020                | .109                 | .196                 |

Notes: 1) Robust standard errors, clustered by market, are in parentheses. 2) \* significant at 10%, \*\* significant at 5%, \*\*\* significant at 1%.

**Table B-7: Robustness test using sample from year 1999 to 2007, conditional fixed-effect Poisson regression**

| Dependent variable:<br>OSS entry                                          | (1)               | (2)               | (3)                  | (4)                 | (5)                 | (6)                | (7)                  | (8)                  |
|---------------------------------------------------------------------------|-------------------|-------------------|----------------------|---------------------|---------------------|--------------------|----------------------|----------------------|
| The Commons                                                               | .166<br>(.118)    | .177<br>(.126)    | .112<br>(.188)       | .131<br>(.191)      | -.088<br>(.150)     | -.133<br>(.159)    | .008<br>(.193)       | -.023<br>(.228)      |
| The Commons *<br>Cumulativeness                                           |                   |                   | .351***<br>(.099)    | .326***<br>(.100)   |                     |                    | .324***<br>(.101)    | .285**<br>(.116)     |
| The Commons *<br>Concentration                                            |                   |                   |                      |                     | .694*<br>(.393)     | .822**<br>(.400)   | .260<br>(.356)       | .385<br>(.477)       |
| Cumulativeness                                                            | .905<br>(1.299)   | .783<br>(1.356)   | 3.245**<br>(1.348)   | 3.006**<br>(1.448)  | .735<br>(1.250)     | .532<br>(1.251)    | 3.053**<br>(1.340)   | 2.654*<br>(1.508)    |
| Concentration                                                             | -9.177<br>(6.649) | -9.075<br>(7.647) | -14.851**<br>(6.555) | -14.526*<br>(7.993) | -14.152*<br>(8.602) | -13.031<br>(8.419) | -16.171**<br>(7.092) | -15.631**<br>(7.798) |
| Sales growth                                                              | -.547*<br>(.332)  | -.453<br>(.349)   | -.696*<br>(.388)     | -.603<br>(.394)     | -.593*<br>(.347)    | -.538<br>(.356)    | -.704*<br>(.389)     | -.623<br>(.394)      |
| Total patents                                                             | -.050<br>(1.442)  | -.409<br>(1.568)  | 1.369<br>(1.501)     | 1.084<br>(1.614)    | -.485<br>(1.461)    | -.891<br>(1.540)   | 1.150<br>(1.490)     | .723<br>(1.682)      |
| Patent quality                                                            | .598<br>(2.858)   | -.049<br>(2.742)  | .707<br>(2.716)      | .321<br>(2.631)     | .949<br>(2.906)     | .429<br>(2.686)    | .821<br>(2.726)      | .497<br>(2.601)      |
| Patent age                                                                | -.159<br>(.214)   | -.081<br>(.222)   | -.160<br>(.216)      | -.095<br>(.221)     | -.291<br>(.245)     | -.203<br>(.221)    | -.202<br>(.236)      | -.143<br>(.225)      |
| OIN patents                                                               |                   | -.025<br>(.081)   |                      | -.031<br>(.076)     |                     | -.026<br>(.080)    |                      | -.030<br>(.076)      |
| SSO patents                                                               |                   | .020<br>(.086)    |                      | .014<br>(.072)      |                     | .060<br>(.090)     |                      | .033<br>(.088)       |
| OSS demand                                                                |                   | .279<br>(.151)    |                      | .209<br>(.149)      |                     | .285*<br>(.151)    |                      | .220<br>(.153)       |
| Year dummies                                                              | Yes               | Yes               | Yes                  | Yes                 | Yes                 | Yes                | Yes                  | Yes                  |
| Market fixed effects                                                      | Yes               | Yes               | Yes                  | Yes                 | Yes                 | Yes                | Yes                  | Yes                  |
| Observations                                                              | 225               | 225               | 225                  | 225                 | 225                 | 225                | 225                  | 225                  |
| Log pseudolikelihood                                                      | -188.888          | -187.365          | -184.880             | -184.056            | -187.799            | -186.019           | -184.758             | -183.826             |
| <i>Marginal effects</i>                                                   |                   |                   |                      |                     |                     |                    |                      |                      |
| The Commons (average)                                                     | .166<br>(.118)    | .177<br>(.126)    | .384*<br>(.198)      | .383*<br>(.203)     | .071<br>(.099)      | .055<br>(.106)     | .319*<br>(.166)      | .286<br>(.192)       |
| The Commons<br>(cumulativeness=10%)                                       |                   |                   | .185<br>(.188)       | .199<br>(.191)      |                     |                    | .135<br>(.160)       | .124<br>(.169)       |
| The Commons<br>(cumulativeness=90%)                                       |                   |                   | .658***<br>(.234)    | .638***<br>(.241)   |                     |                    | .571***<br>(.203)    | .507**<br>(.250)     |
| Test of the difference<br>between high and low<br>cumulativeness, p-value |                   |                   | .001                 | .001                |                     |                    | .001                 | .014                 |
| The Commons<br>(concentration =10%)                                       |                   |                   |                      |                     | .009<br>(.113)      | -.018<br>(.121)    | .296*<br>(.178)      | .251<br>(.219)       |
| The Commons<br>(concentration =90%)                                       |                   |                   |                      |                     | .141<br>(.097)      | .138<br>(.101)     | .345**<br>(.159)     | .324*<br>(.169)      |
| Test of the difference<br>between high and low<br>concentration, p-value  |                   |                   |                      |                     | .077                | .040               | .466                 | .419                 |

Notes: 1) Robust standard errors, clustered by market, are in parentheses. 2) \* significant at 10%, \*\* significant at 5%, \*\*\* significant at 1%.

**Table B-8: Robustness test adding “Top 4 incumbents market share”, conditional fixed-effect Poisson regression, includes baseline controls**

| Dependent variable: OSS entry                                                      | (1)                | (2)                  | (3)              | (4)                | (5)                | (6)                  |
|------------------------------------------------------------------------------------|--------------------|----------------------|------------------|--------------------|--------------------|----------------------|
| The Commons                                                                        | -.127<br>(.114)    | -.114<br>(.137)      | .237*<br>(.135)  | .169<br>(.187)     | -.068<br>(.118)    | -.059<br>(.141)      |
| The Commons * Cumulativeness                                                       |                    | .284***<br>(.101)    |                  | .298***<br>(.097)  |                    | .266***<br>(.100)    |
| The Commons * Concentration                                                        | .810**<br>(.330)   | .516<br>(.319)       |                  |                    | 1.170***<br>(.425) | .845**<br>(.396)     |
| The Commons * Top 4 incumbent market share                                         |                    |                      | -.130<br>(.147)  | -.159<br>(.135)    | -.261*<br>(.144)   | -.230*<br>(.137)     |
| Cumulativeness                                                                     | .257<br>(1.076)    | 2.313*<br>(1.243)    | .412<br>(1.195)  | 2.453**<br>(1.109) | .252<br>(1.062)    | 2.174*<br>(1.298)    |
| Concentration                                                                      | -11.613<br>(7.959) | -13.190**<br>(6.696) |                  |                    | -10.889<br>(7.323) | -12.528**<br>(6.278) |
| Sales growth                                                                       | -.543<br>(.383)    | -.660*<br>(.363)     | -.334<br>(.463)  | -.461<br>(.451)    | -.174<br>(.418)    | -.311<br>(.421)      |
| Total patents                                                                      | -1.273<br>(1.398)  | .232<br>(1.463)      | -.262<br>(1.284) | 1.328<br>(1.281)   | -1.194<br>(1.381)  | .189<br>(1.429)      |
| Patent quality                                                                     | -.594<br>(2.433)   | -.583<br>(2.355)     | -.687<br>(2.398) | -.466<br>(2.283)   | -.722<br>(2.422)   | -.731<br>(2.288)     |
| Patent age                                                                         | -.433**<br>(.187)  | -.337*<br>(.194)     | -.312*<br>(.169) | -.295*<br>(.169)   | -.512**<br>(.197)  | -.411**<br>(.203)    |
| Top 4 incumbents market share                                                      | .911<br>(1.235)    | .909<br>(1.133)      | 1.114<br>(1.321) | 1.204<br>(1.153)   | 1.270<br>(1.159)   | 1.186<br>(1.127)     |
| Year dummies                                                                       | Yes                | Yes                  | Yes              | Yes                | Yes                | Yes                  |
| Market fixed effects                                                               | Yes                | Yes                  | Yes              | Yes                | Yes                | Yes                  |
| Observations                                                                       | 286                | 286                  | 286              | 286                | 286                | 286                  |
| Log pseudolikelihood                                                               | -225.372           | -222.646             | -226.879         | -223.455           | -223.776           | -221.439             |
| <i>Marginal effects</i>                                                            |                    |                      |                  |                    |                    |                      |
| The Commons (average)                                                              | .052<br>(.077)     | .211**<br>(.105)     | .184*<br>(.102)  | .326**<br>(.162)   | .086<br>(.075)     | .232**<br>(.105)     |
| The Commons (cumulativeness=10%)                                                   |                    | .054<br>(.114)       |                  | .160<br>(.158)     | -.018<br>(.089)    | .085<br>(.113)       |
| The Commons (cumulativeness=90%)                                                   |                    | .418***<br>(.134)    |                  | .544***<br>(.191)  | .205**<br>(.082)   | .426***<br>(.135)    |
| Test of the difference between high and low cumulativeness, p-value                |                    | .005                 |                  | .002               | .006               | .008                 |
| The Commons (concentration =10%)                                                   | -.020<br>(.087)    | .165<br>(.111)       |                  |                    |                    | .157<br>(.110)       |
| The Commons (concentration =90%)                                                   | .135<br>(.079)     | .263**<br>(.106)     |                  |                    |                    | .318***<br>(.114)    |
| Test of the difference between high and low concentration, p-value                 | .014               | .106                 |                  |                    |                    | .033                 |
| The Commons (Top 4 incumbent market share =10%)                                    |                    |                      | .217*<br>(.120)  | .365**<br>(.180)   | .151*<br>(.084)    | .290**<br>(.119)     |
| The Commons (Top 4 incumbent market share =90%)                                    |                    |                      | .150<br>(.096)   | .283*<br>(.148)    | .017<br>(.084)     | .171*<br>(.102)      |
| Test of the difference between high and low top 4 incumbents market share, p-value |                    |                      | .377             | .241               | .070               | .093                 |

Notes: 1) Robust standard errors, clustered by market, are in parentheses. 2) \* significant at 10%, \*\* significant at 5%, \*\*\* significant at 1%.

**Table B-9: Robustness test adding “Top 4 incumbents market share”, conditional fixed-effect Poisson regression, includes full set of controls**

| Dependent variable: OSS entry                                                      | (1)                | (2)                 | (3)               | (4)                | (5)                | (6)                 |
|------------------------------------------------------------------------------------|--------------------|---------------------|-------------------|--------------------|--------------------|---------------------|
| The Commons                                                                        | -.137<br>(.144)    | -.109<br>(.185)     | .231<br>(.154)    | .172<br>(.197)     | -.090<br>(.155)    | -.066<br>(.193)     |
| The Commons * Cumulativeness                                                       |                    | .250**<br>(.109)    |                   | .269***<br>(.097)  |                    | .235**<br>(.105)    |
| The Commons * Concentration                                                        | .863**<br>(.377)   | .565<br>(.436)      |                   |                    | 1.187**<br>(.495)  | .869*<br>(.525)     |
| The Commons * Top 4 incumbent market share                                         |                    |                     | -.107<br>(.161)   | -.136<br>(.153)    | -.229<br>(.158)    | -.205<br>(.153)     |
| Cumulativeness                                                                     | .290<br>(1.094)    | 2.154*<br>(1.321)   | .487<br>(1.265)   | 2.353**<br>(1.121) | .259<br>(1.112)    | 2.009<br>(1.366)    |
| Concentration                                                                      | -11.244<br>(8.449) | -13.271*<br>(7.754) |                   |                    | -10.599<br>(8.265) | -12.601*<br>(7.633) |
| Sales growth                                                                       | -.500<br>(.389)    | -.605*<br>(.372)    | -.322<br>(.478)   | -.452<br>(.468)    | -.179<br>(.432)    | -.297<br>(.435)     |
| Total patents                                                                      | -1.517<br>(1.505)  | -.042<br>(1.634)    | -.456<br>(1.518)  | 1.108<br>(1.456)   | -1.410<br>(1.484)  | -.056<br>(1.597)    |
| Patent quality                                                                     | -1.307<br>(2.308)  | -1.104<br>(2.261)   | -1.335<br>(2.339) | -.935<br>(2.231)   | -1.291<br>(2.267)  | -1.134<br>(2.173)   |
| Patent age                                                                         | -.309*<br>(.172)   | -.246<br>(.181)     | -.218<br>(.190)   | -.213<br>(.191)    | -.039**<br>(.193)  | -.322<br>(.200)     |
| Top 4 incumbents market share                                                      | 1.173<br>(1.150)   | 1.183<br>(1.087)    | 1.347<br>(1.203)  | 1.421<br>(1.097)   | 1.452<br>(1.121)   | 1.394<br>(1.105)    |
| OIN patents                                                                        | -.075<br>(.070)    | -.072<br>(.067)     | -.066<br>(.074)   | -.066<br>(.070)    | -.068<br>(.071)    | -.064<br>(.068)     |
| SSO patents                                                                        | .034<br>(.088)     | .015<br>(.085)      | .002<br>(.069)    | .006<br>(.055)     | .035<br>(.087)     | .017<br>(.085)      |
| OSS demand                                                                         | .317**<br>(.157)   | .257*<br>(.155)     | .296*<br>(.165)   | .223<br>(.156)     | .288<br>(.160)     | .234<br>(.155)      |
| Year dummies                                                                       | Yes                | Yes                 | Yes               | Yes                | Yes                | Yes                 |
| Market fixed effects                                                               | Yes                | Yes                 | Yes               | Yes                | Yes                | Yes                 |
| Observations                                                                       | 286                | 286                 | 286               | 286                | 286                | 286                 |
| Log pseudolikelihood                                                               | -223.222           | -221.227            | -225.012          | -222.357           | -222.022           | -220.278            |
| <i>Marginal effects</i>                                                            |                    |                     |                   |                    |                    |                     |
| The Commons (average)                                                              | .054<br>(.092)     | .202<br>(.138)      | .188*<br>(.113)   | .317*<br>(.169)    | .081<br>(.096)     | .219<br>(.141)      |
| The Commons (cumulativeness=10%)                                                   |                    | .063<br>(.131)      |                   | .168<br>(.162)     |                    | .088<br>(.134)      |
| The Commons (cumulativeness=90%)                                                   |                    | .384**<br>(.181)    |                   | .513**<br>(.202)   |                    | .391**<br>(.181)    |
| Test of the difference between high and low cumulativeness, p-value                |                    | .022                |                   | .005               |                    | .025                |
| The Commons (concentration =10%)                                                   | -.023<br>(.108)    | .151<br>(.162)      |                   |                    | -.025<br>(.117)    | .141<br>(.164)      |
| The Commons (concentration =90%)                                                   | .142<br>(.087)     | .259**<br>(.122)    |                   |                    | .202**<br>(.094)   | .307**<br>(.131)    |
| Test of the difference between high and low concentration, p-value                 | .022               | .195                |                   |                    | .017               | .098                |
| The Commons (Top 4 incumbent market share =10%)                                    |                    |                     | .215<br>(.136)    | .350*<br>(.192)    | .138<br>(.105)     | .269*<br>(.153)     |
| The Commons (Top 4 incumbent market share =90%)                                    |                    |                     | .160<br>(.102)    | .281*<br>(.152)    | .020<br>(.103)     | .164<br>(.140)      |
| Test of the difference between high and low top 4 incumbents market share, p-value |                    |                     | .507              | .377               | .149               | .180                |

Notes: 1) Robust standard errors, clustered by market, are in parentheses. 2) \* significant at 10%, \*\* significant at 5%, \*\*\* significant at 1%.

**Table B-10: The impact of a broader set of IP actions by IBM, conditional fixed-effect Poisson regression, includes full set of controls**

| Dependent variable: OSS entry | (1)                 | (2)                 | (3)                 | (4)                 |
|-------------------------------|---------------------|---------------------|---------------------|---------------------|
| The Commons                   | .464***<br>(.163)   | .507**<br>(.196)    | .401***<br>(.151)   | .430**<br>(.186)    |
| The Commons in 2005 X Year 04 | .783***<br>(.185)   | .815***<br>(.200)   |                     |                     |
| The Commons in 2005 X Year 03 | .287*<br>(.153)     | .318**<br>(.138)    |                     |                     |
| The Commons in 2005 X Year 02 |                     | .137<br>(.187)      |                     |                     |
| IBM matched patents X Year 04 |                     |                     | .422***<br>(.110)   | .437***<br>(.119)   |
| IBM matched patents X Year 03 |                     |                     | .124<br>(.117)      | .140<br>(.114)      |
| IBM matched patents X Year 02 |                     |                     |                     | .083<br>(.141)      |
| IBM matched patents           |                     |                     | .134<br>(.551)      | .113<br>(.535)      |
| Cumulativeness                | -1.391<br>(1.303)   | -1.660<br>(1.356)   | -1.023<br>(1.303)   | -1.151<br>(1.319)   |
| Concentration                 | -12.893*<br>(7.641) | -13.991*<br>(7.888) | -12.657*<br>(7.522) | -13.203*<br>(7.774) |
| Sales growth                  | -.422<br>(.326)     | -.424<br>(.333)     | -.327<br>(.3271)    | -.328<br>(.333)     |
| Total patents                 | -3.064**<br>(1.551) | -3.339**<br>(1.512) | -3.138**<br>(1.461) | -3.293**<br>(1.444) |
| Patent quality                | -2.981<br>(2.326)   | -3.146<br>(2.287)   | -3.320<br>(2.170)   | -3.455<br>(2.143)   |
| Patent age                    | -.339<br>(.217)     | -.369*<br>(.224)    | -.250<br>(.247)     | -.267<br>(.253)     |
| OIN patents                   | -.037<br>(.071)     | -.034<br>(.070)     | -.026<br>(.070)     | -.023<br>(.069)     |
| SSO patents                   | -.032<br>(.074)     | -.037<br>(.077)     | -.040<br>(.077)     | -.042<br>(.079)     |
| OSS demand                    | .286*<br>(.146)     | .279*<br>(.146)     | .287*<br>(.154)     | .282*<br>(.152)     |
| Log pseudolikelihood          | -218.234            | -217.934            | -219.385            | -219.203            |

Notes: 1) All regressions include year dummies and market fixed effects. Number of observations=286. 2) Robust standard errors, clustered by market, are in parentheses. 3) \* significant at 10%, \*\* significant at 5%, \*\*\* significant at 1%. 4) *Year 04 (03/02)* is a dummy that turns on for year 2004 (2003 / 2002). 5) *IBM matched patents* is measured using the log of claims-weighted patent count of IBM patents that were not pledged but belong to the same primary USPTO classification at the subclass level as its patents in The Commons and that were applied for in the same year.

**Table B-11: Falsification test on proprietary product entry, use sample from year 2002 to 2006**

| Dependent variable: Product entry by start-ups      | Sample based on proprietary entry only | Sample based on both proprietary entry and OSS entry |
|-----------------------------------------------------|----------------------------------------|------------------------------------------------------|
|                                                     | (1)                                    | (2)                                                  |
| The Commons                                         | .027<br>(.044)                         | .022<br>(.044)                                       |
| The Commons *OSS-market                             |                                        | .197***<br>(.044)                                    |
| Cumulativeness                                      | -3.580***<br>(1.299)                   | -3.546***<br>(1.283)                                 |
| Concentration                                       | 3.355<br>(4.826)                       | 3.732<br>(4.673)                                     |
| Sales growth                                        | .001<br>(.273)                         | -.012<br>(.270)                                      |
| Total patents                                       | 5.767***<br>(1.804)                    | 5.887***<br>(1.772)                                  |
| Patent quality                                      | 8.008**<br>(3.668)                     | 8.128**<br>(3.609)                                   |
| Patent age                                          | .275<br>(.298)                         | .275<br>(.293)                                       |
| Log pseudolikelihood                                | -308.188                               | -332.435                                             |
| <i>Marginal effects</i>                             |                                        |                                                      |
| [1] Commons (proprietary market)                    | .027<br>(.044)                         | .022<br>(.044)                                       |
| [2] Commons (OSS market)                            |                                        | .220***<br>(.061)                                    |
| Test of the difference between [1] and [2], p-value |                                        | .001                                                 |

Notes: 1) All regressions include year dummies and market fixed effects. 2) Robust standard errors, clustered by market, are in parentheses. 3) \* significant at 10%, \*\* significant at 5%, \*\*\* significant at 1%. 4) Column (1) is based on a sample consisting of proprietary entry into 29 software markets from 2002 to 2006, and therefore with 145 observations in total. 5) Column (2) is based on a sample consisting of product entry into 29 OSS markets and 29 proprietary software markets from 2002 to 2006. However, 20 markets are dropped because there is no entry observed throughout the sample period; therefore, this sample has 190 observations in total.

**Table B-12: Average product entry into an OSS market in a year**

The numbers in the table below presents the mean value of “*Product Entry<sub>jt</sub>*” used in columns 5-8 in table 8 for OSS markets, split along three dimensions: (1) by markets where The Commons is small vs. large; (2) by markets with low vs. high cumulateness/concentration; and (3) by period (i.e., pre-Commons (1999-2004) vs. post-Commons (2005-2009)).

Markets where The Commons is small (large) are defined as those where the number of claims-weighted patents in The Commons is below the 25th percentile (above the 75th percentile). Within the markets where The Commons is small/large: the low vs. high cumulateness/concentration is defined based on a median split.

As shown by this table, because we only use PROMT codes to identify entry into OSS markets in table 8, the variance of “*Product Entry<sub>jt</sub>*” for OSS markets before and after The Commons by the size of The Commons and by the level of cumulateness/concentration is very small.

| <i>By the size of The Commons and the level of cumulateness</i>  |                   |              |                    |              |
|------------------------------------------------------------------|-------------------|--------------|--------------------|--------------|
|                                                                  | Low cumulateness  |              | High cumulateness  |              |
|                                                                  | Pre-Commons       | Post-Commons | Pre- Commons       | Post-Commons |
| Markets where The Commons is small                               | 0                 | .083         | 0                  | .077         |
| Markets where The Commons is large                               | 0                 | .167         | .2                 | .588         |
| <i>By the size of The Commons and the level of concentration</i> |                   |              |                    |              |
|                                                                  | Low concentration |              | High concentration |              |
|                                                                  | Pre-Commons       | Post-Commons | Pre- Commons       | Post-Commons |
| Markets where The Commons is small                               | 0                 | 0            | 0                  | .143         |
| Markets where The Commons is large                               | 0                 | .388         | .2                 | .353         |

**Table B-13: Falsification test on proprietary product entry, conditional fixed-effect Poisson regression with the full set of controls**

| Dependent variable: Product entry by start-ups       | Sample based on proprietary entry only |                   |                    |                    | Sample based on both proprietary entry and OSS entry |                    |                    |                     |
|------------------------------------------------------|----------------------------------------|-------------------|--------------------|--------------------|------------------------------------------------------|--------------------|--------------------|---------------------|
|                                                      | (1)                                    | (2)               | (3)                | (4)                | (5)                                                  | (6)                | (7)                | (8)                 |
| The Commons                                          | .050<br>(.052)                         | .026<br>(.072)    | .154<br>(.113)     | .139<br>(.114)     | .044<br>(.050)                                       | .017<br>(.071)     | .147<br>(.111)     | .130<br>(.112)      |
| The Commons*<br>Cumulativeness                       |                                        | .040<br>(.090)    |                    | .111<br>(.081)     |                                                      | .046<br>(.091)     |                    | .117<br>(.082)      |
| The Commons*<br>Concentration                        |                                        |                   | -.276<br>(.266)    | -.416<br>(.270)    |                                                      |                    | -.274<br>(.261)    | -.419<br>(.263)     |
| The Commons*<br>OSS-market                           |                                        |                   |                    |                    | .266***<br>(.043)                                    | .348***<br>(.111)  | .352<br>(.262)     | .315<br>(.257)      |
| The Commons*<br>Cumulativeness* OSS-market           |                                        |                   |                    |                    |                                                      | -.212<br>(.258)    |                    | -.225<br>(.322)     |
| The Commons*<br>Concentration* OSS-market            |                                        |                   |                    |                    |                                                      |                    | -.302<br>(.890)    | .187<br>(1.084)     |
| Cumulativeness                                       | -2.917<br>(2.122)                      | -2.237<br>(3.010) | -3.328<br>(2.185)  | -1.649<br>(2.982)  | -2.977<br>(2.096)                                    | -2.275<br>(3.004)  | -3.405<br>(2.160)  | -1.690<br>(2.970)   |
| Concentration                                        | -3.296<br>(6.303)                      | -3.647<br>(6.452) | -1.269<br>(7.011)  | -1.243<br>(6.828)  | -4.184<br>(5.940)                                    | -4.427<br>(6.097)  | -2.104<br>(6.660)  | -2.115<br>(6.453)   |
| Sales growth                                         | .154<br>(.267)                         | .161<br>(.276)    | .148<br>(.266)     | .160<br>(.269)     | .128<br>(.263)                                       | .137<br>(.272)     | .121<br>(.263)     | .136<br>(.266)      |
| Total patents                                        | 5.096*<br>(2.797)                      | 5.202*<br>(2.808) | 6.325**<br>(2.885) | 7.246**<br>(2.925) | 5.262*<br>(2.742)                                    | 5.402**<br>(2.755) | 6.493**<br>(2.834) | 7.456***<br>(2.872) |
| Patent quality                                       | 7.080<br>(5.446)                       | 6.822<br>(5.619)  | 8.430<br>(5.416)   | 8.410<br>(5.527)   | 7.932<br>(5.365)                                     | 7.178<br>(5.554)   | 8.756*<br>(5.345)  | 8.785<br>(5.471)    |
| Patent age                                           | .257<br>(.269)                         | .275<br>(.263)    | .318<br>(.303)     | .399<br>(.307)     | .254<br>(.264)                                       | .271<br>(.258)     | .314<br>(.297)     | .395<br>(.299)      |
| OIN patents                                          | .056<br>(.057)                         | .057<br>(.056)    | .045<br>(.055)     | .041<br>(.055)     | .056<br>(.055)                                       | .057<br>(.054)     | .045<br>(.053)     | .042<br>(.053)      |
| SSO patents                                          | -.069<br>(.062)                        | -.071<br>(.065)   | -.079<br>(.062)    | -.091<br>(.066)    | -.065<br>(.061)                                      | -.067<br>(.065)    | -.074<br>(.062)    | -.086<br>(.066)     |
| OSS demand                                           | -.162<br>(.216)                        | -.163<br>(.212)   | -.206<br>(.227)    | -.231<br>(.223)    | -.185<br>(.211)                                      | -.185<br>(.208)    | -.228<br>(.222)    | -.255<br>(.218)     |
| Log pseudolikelihood                                 | -441.266                               | -441.047          | -439.866           | -438.5566          | -491.680                                             | -491.171           | -490.227           | -488.608            |
| <i>Marginal effects</i>                              |                                        |                   |                    |                    |                                                      |                    |                    |                     |
| [1] Commons (proprietary market)                     | .051<br>(.052)                         | .051<br>(.053)    | .092<br>(.063)     | .114*<br>(.065)    | .044<br>(.050)                                       | .045<br>(.052)     | .083<br>(.060)     | .106*<br>(.062)     |
| [2] Commons (OSS market)                             |                                        |                   |                    |                    | .309***<br>(.067)                                    | .261***<br>(.090)  | .365***<br>(.090)  | .324**<br>(.138)    |
| Test of the difference between [1] and [2], p-value  |                                        |                   |                    |                    | .001                                                 | .003               | .001               | .064                |
| [3] Commons (proprietary market, cumulativeness=10%) |                                        | .033<br>(.062)    |                    | .066<br>(.068)     |                                                      | .024<br>(.062)     |                    | .053<br>(.066)      |
| [4] Commons (proprietary market, cumulativeness=90%) |                                        | .074<br>(.080)    |                    | .180**<br>(.088)   |                                                      | .071<br>(.080)     |                    | .174**<br>(.085)    |
| Test of the difference between [3] and [4], p-value  |                                        | .656              |                    | .172               |                                                      | .615               |                    | .151                |
| [5] Commons (proprietary market, concentration=10%)  |                                        |                   | .115<br>(.080)     | .147<br>(.081)     |                                                      |                    | .108<br>(.078)     | .143*<br>(.079)     |
| [6] Commons (proprietary market, concentration =90%) |                                        |                   | .069<br>(.050)     | .078<br>(.053)     |                                                      |                    | .062<br>(.049)     | .074<br>(.051)      |
| Test of the difference between [5] and [6], p-value  |                                        |                   | .300               | .122               |                                                      |                    | .294               | .110                |

Notes: 1) All regressions include year dummies and market fixed effects. 2) Robust standard errors, clustered by market, are in parentheses. 3) \* significant at 10%, \*\* significant at 5%, \*\*\* significant at 1%. 4) Columns (1) to (4) are based on a sample consisting of proprietary entry into 29 software markets from 2002 to 2009, and therefore with 232 observations in total. 5) Columns (5) to (8) are based on a sample consisting of product entry into 29 OSS markets and 29 proprietary software markets. However, because 18 markets are dropped because there is no entry observed throughout the sample period; therefore, this sample has 320 observations in total. 6) These results need to be interpreted with caution, as in this exercise we only used entry events (for both OSS and proprietary products) identified through PROMPT articles assigned with product codes.

**Figure B-1: The extent of cumulateness across markets**

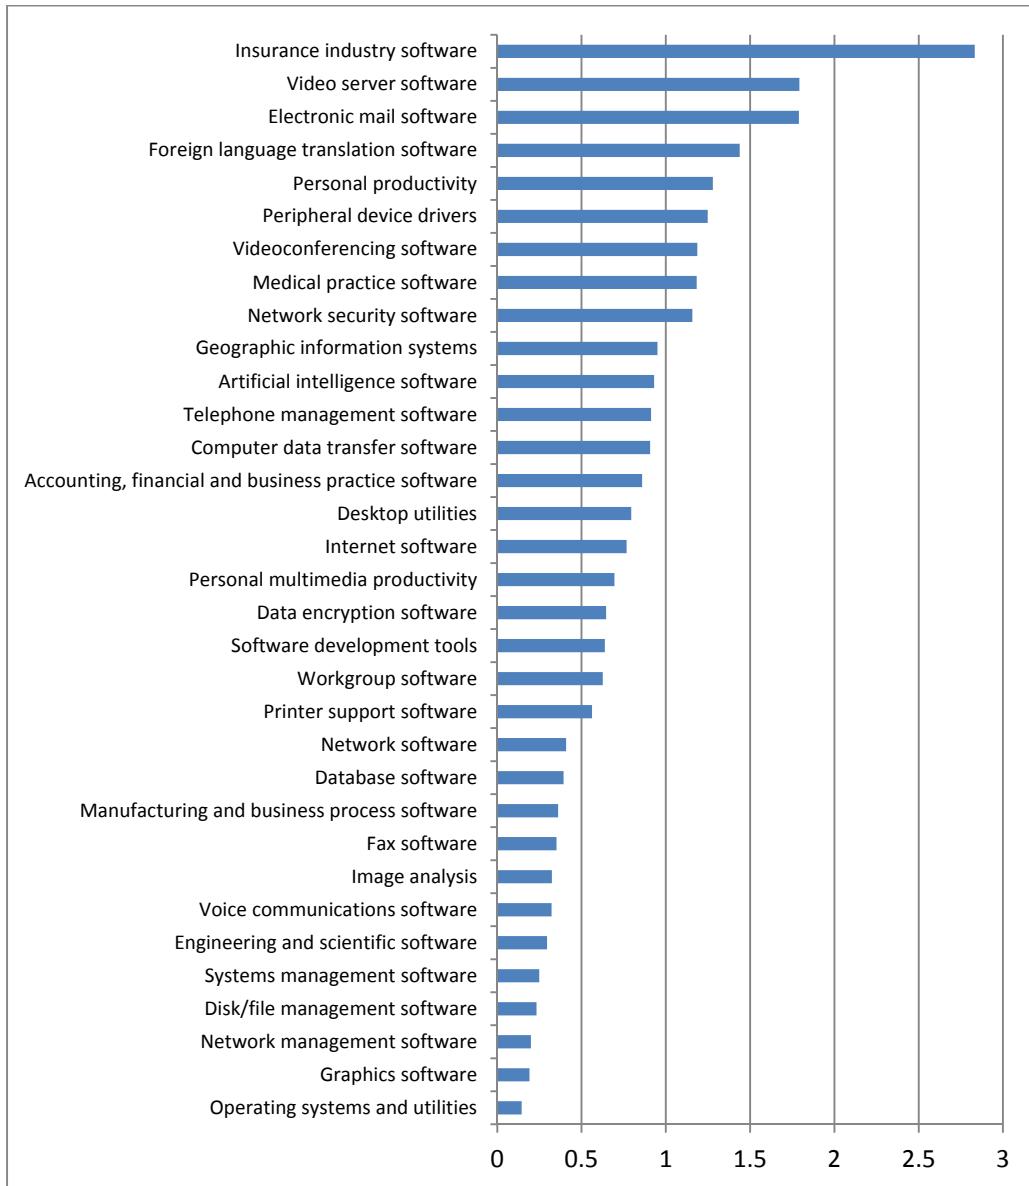

Notes: The numbers on the horizontal axis are the extent of cumulateness.

**Figure B-2: The extent of concentration across markets**

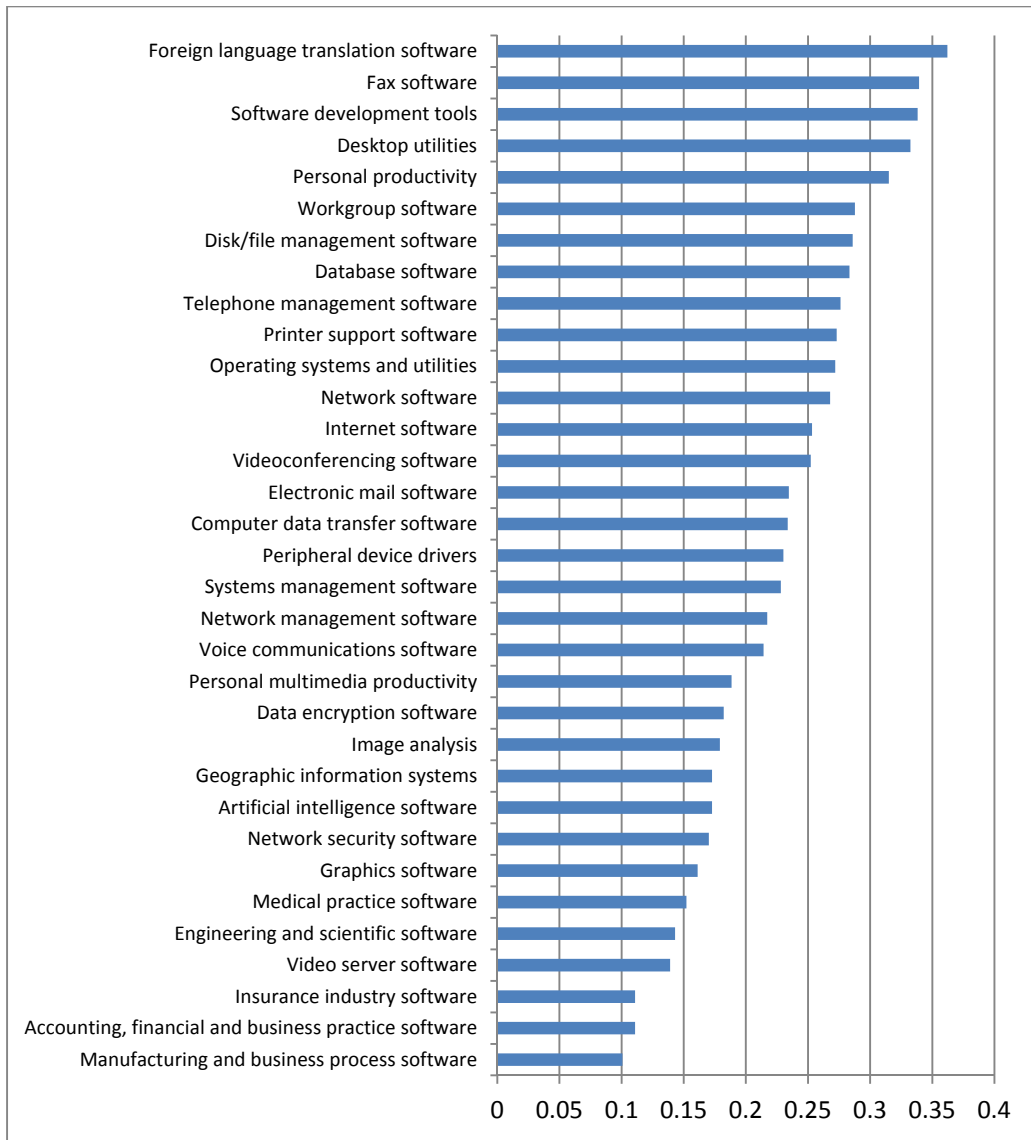

Notes: The numbers on the horizontal axis are the extent of concentration.
